# Supplementary material
Source: Elsevier journal article supplement (https://comptes-rendus.academie-sciences.fr/geoscience/article/10.1016/j.crte.2017.02.004/file/attach/mmc2.pdf)
Supplement: mmc2 [file mmc2.pdf]

**Table SM 1** Major and trace element concentrations of the Sirstan granitoid (SG) rocks. Eu/Eu\*:  $\text{Eu}_N/\text{Eu}^*(\text{Sm}_N/\text{Gd}_N)$ .

| Sample                                   | S4    | S6    | S12   | S14   | S17   | S19   | S27   | S29   | S30   | XeS    |
|------------------------------------------|-------|-------|-------|-------|-------|-------|-------|-------|-------|--------|
| SiO <sub>2</sub> (%)                     | 60.70 | 61.41 | 61.13 | 61.14 | 57.02 | 60.05 | 59.52 | 59.88 | 61.09 | 59.92  |
| TiO <sub>2</sub>                         | 0.63  | 0.65  | 0.64  | 0.62  | 0.74  | 0.66  | 0.71  | 0.64  | 0.65  | 0.63   |
| Al <sub>2</sub> O <sub>3</sub>           | 16.69 | 15.70 | 15.39 | 16.02 | 16.05 | 15.81 | 15.36 | 15.64 | 15.30 | 16.20  |
| Fe <sub>2</sub> O <sub>3</sub>           | 6.58  | 6.91  | 7.04  | 6.56  | 8.76  | 7.65  | 7.89  | 7.63  | 7.33  | 9.28   |
| MnO                                      | 0.14  | 0.14  | 0.15  | 0.14  | 0.19  | 0.15  | 0.15  | 0.15  | 0.14  | 0.12   |
| MgO                                      | 2.50  | 2.56  | 2.91  | 2.49  | 3.99  | 3.29  | 3.44  | 3.31  | 3.00  | 3.26   |
| CaO                                      | 6.66  | 6.40  | 6.80  | 5.72  | 7.07  | 5.67  | 6.75  | 5.86  | 6.60  | 2.74   |
| Na <sub>2</sub> O                        | 3.35  | 3.05  | 2.99  | 3.17  | 3.12  | 3.13  | 2.87  | 2.78  | 2.90  | 4.25   |
| K <sub>2</sub> O                         | 0.80  | 0.73  | 1.04  | 0.55  | 1.00  | 1.38  | 0.89  | 1.40  | 0.98  | 1.09   |
| P <sub>2</sub> O <sub>5</sub>            | 0.11  | 0.11  | 0.09  | 0.11  | 0.10  | 0.09  | 0.09  | 0.10  | 0.09  | 0.09   |
| H <sub>2</sub> O-                        | 0.17  | 0.07  | 0.12  | 0.07  | 0.00  | 0.12  | 0.10  | 0.00  | 0.00  | 0.15   |
| L.O.I                                    | 1.38  | 1.39  | 1.30  | 1.91  | 1.70  | 1.88  | 1.86  | 1.84  | 1.41  | 2.78   |
| Total                                    | 99.70 | 99.11 | 99.61 | 98.49 | 99.73 | 99.87 | 99.62 | 99.22 | 99.47 | 100.50 |
| (Na <sub>2</sub> O+K <sub>2</sub> O)/CaO | 0.62  | 0.59  | 0.59  | 0.65  | 0.58  | 0.80  | 0.56  | 0.71  | 0.59  | 1.95   |
| (Na <sub>2</sub> O+K <sub>2</sub> O)     | 4.23  | 3.87  | 4.10  | 3.85  | 4.20  | 4.61  | 3.85  | 4.29  | 3.95  | 5.47   |
| V (ppm)                                  | 151   | 167   | 185   | 148   | 241   | 200   | 226   | 208   | 196   | 161    |
| Cr                                       | 6.6   | 7.9   | 18.3  | 8.3   | 20.0  | 18.3  | 19.9  | 19.0  | 17.9  | 13.1   |
| Co                                       | 32.4  | 34.6  | 36.0  | 37.5  | 31.5  | 39.0  | 39.7  | 40.3  | 61.6  | 17.3   |
| Ni                                       | 3.5   | 24.8  | 8.7   | 3.9   | 9.7   | 8.3   | 8.8   | 7.8   | 7.7   | 4.8    |
| Cu                                       | 27.8  | 142   | 23.5  | 25.1  | 63.4  | 69.3  | 33.2  | 42.1  | 26.3  | 12.2   |
| Zn                                       | 64.5  | 149   | 83.6  | 73.4  | 96.8  | 75.9  | 72.7  | 73.7  | 71.0  | 46.5   |
| Ga                                       | 16.7  | 14.3  | 14.2  | 16.2  | 15.6  | 14.8  | 13.9  | 13.7  | 14.3  | 14.6   |
| Rb                                       | 16.9  | 14.9  | 22.8  | 10.9  | 24.6  | 33.8  | 23.8  | 31.5  | 22.9  | 27.7   |
| Sr                                       | 222   | 208   | 187   | 236   | 171   | 142   | 171   | 140   | 183   | 165    |
| Zr                                       | 52.2  | 57.5  | 81.6  | 60.6  | 59.1  | 79.5  | 59.4  | 45.9  | 78.8  | 121    |
| Nb                                       | 5.0   | 5.3   | 5.1   | 5.4   | 4.8   | 4.6   | 4.8   | 4.5   | 5.5   | 2.7    |
| Cs                                       | 0.5   | 0.4   | 0.4   | 0.4   | 0.5   | 0.6   | 0.7   | 0.5   | 0.4   | 0.7    |
| Ba                                       | 236   | 210   | 277   | 198   | 344   | 468   | 245   | 404   | 271   | 284    |
| Pb                                       | 5.6   | 3.2   | 4.7   | 6.7   | 6.1   | 4.2   | 3.7   | 3.1   | 3.2   | 4.9    |
| Th                                       | 2.2   | 2.1   | 2.5   | 2.4   | 1.6   | 2.1   | 2.4   | 2.4   | 2.7   | 4.4    |
| U                                        | 0.5   | 0.5   | 0.6   | 0.6   | 0.4   | 0.5   | 0.6   | 0.6   | 0.6   | 1.0    |
| Y                                        | 22.8  | 25.1  | 26.8  | 15.5  | 23.8  | 24.0  | 23.9  | 21.9  | 26.2  | 33.0   |
| La                                       | 9.17  | 8.78  | 9.06  | 6.26  | 8.74  | 8.47  | 8.44  | 7.23  | 9.01  | 8.19   |
| Ce                                       | 20.0  | 20.0  | 20.5  | 13.7  | 18.8  | 19.1  | 18.7  | 18.4  | 20.0  | 27.0   |
| Pr                                       | 2.50  | 2.60  | 2.71  | 1.71  | 2.51  | 2.55  | 2.52  | 2.22  | 2.65  | 2.86   |
| Nd                                       | 11.0  | 11.6  | 12.2  | 7.5   | 10.8  | 11.5  | 11.0  | 10.1  | 12.1  | 12.5   |
| Sm                                       | 2.98  | 3.07  | 3.25  | 2.03  | 2.97  | 3.05  | 2.91  | 2.74  | 3.10  | 3.64   |
| Eu                                       | 0.99  | 1.02  | 0.883 | 0.675 | 0.897 | 0.923 | 0.887 | 0.809 | 0.935 | 0.722  |
| Gd                                       | 3.28  | 3.67  | 3.93  | 2.24  | 3.50  | 3.59  | 3.42  | 3.27  | 3.79  | 4.70   |
| Tb                                       | 0.574 | 0.630 | 0.684 | 0.392 | 0.559 | 0.594 | 0.624 | 0.593 | 0.720 | 0.868  |

|                      |       |       |       |       |       |       |       |       |       |       |
|----------------------|-------|-------|-------|-------|-------|-------|-------|-------|-------|-------|
| Dy                   | 3.84  | 4.29  | 4.54  | 2.62  | 4.10  | 4.14  | 4.30  | 4.00  | 4.53  | 6.16  |
| Ho                   | 0.868 | 0.861 | 1.01  | 0.592 | 0.889 | 0.901 | 0.937 | 0.885 | 0.994 | 1.37  |
| Er                   | 2.54  | 2.84  | 2.84  | 1.74  | 2.76  | 2.71  | 2.79  | 2.64  | 2.89  | 4.26  |
| Tm                   | 0.410 | 0.420 | 0.422 | 0.280 | 0.423 | 0.427 | 0.403 | 0.360 | 0.458 | 0.662 |
| Yb                   | 2.63  | 2.86  | 3.23  | 1.80  | 2.87  | 2.72  | 2.78  | 2.67  | 2.93  | 4.60  |
| Lu                   | 0.417 | 0.458 | 0.441 | 0.284 | 0.443 | 0.403 | 0.406 | 0.407 | 0.481 | 0.683 |
| Hf                   | 1.90  | 2.18  | 2.91  | 2.14  | 2.06  | 2.66  | 2.27  | 1.91  | 2.81  | 4.08  |
| Ta                   | 0.390 | 0.393 | 0.355 | 0.360 | 0.320 | 0.330 | 0.409 | 0.428 | 0.472 | 0.162 |
| (La/Yb) <sub>N</sub> | 2.50  | 2.21  | 2.01  | 2.50  | 2.18  | 2.23  | 2.17  | 1.94  | 2.21  | 1.28  |
| 10000*Ga/Al          | 1.85  | 1.68  | 1.71  | 1.84  | 1.80  | 1.73  | 1.67  | 1.61  | 1.74  | 1.70  |
| K/Rb                 | 397   | 418   | 385   | 433   | 345   | 347   | 318   | 379   | 360   | 333   |
| Rb/Sr                | 0.076 | 0.072 | 0.122 | 0.046 | 0.143 | 0.237 | 0.139 | 0.226 | 0.125 | 0.168 |
| Th/Ta                | 5.51  | 5.45  | 7.02  | 6.78  | 4.84  | 6.42  | 5.98  | 5.51  | 5.74  | 27.4  |
| Ta/Yb                | 0.15  | 0.14  | 0.11  | 0.20  | 0.11  | 0.12  | 0.15  | 0.16  | 0.16  | 0.04  |
| Th/Yb                | 0.82  | 0.75  | 0.77  | 1.36  | 0.54  | 0.78  | 0.88  | 0.88  | 0.93  | 0.97  |

---

Eu/Eu\*:Eu<sub>N</sub>/(Sm<sub>N</sub>.Gd<sub>N</sub>)

**Table SM 2** LA-ICP-MS analyses for zircon grains from the Sirstan granitoid (SG) rocks

| Spot        | Th/U | <sup>206</sup> Pb <sub>c</sub> *<br>(%) | <sup>207</sup> Pb/ <sup>206</sup> Pb | ±Error<br>2□ | <sup>206</sup> Pb/ <sup>238</sup> U | ±Error<br>2□ | <sup>207</sup> Pb/ <sup>235</sup> U | ±Error<br>2□ | <sup>238</sup> U/ <sup>206</sup> Pb<br>age (Ma) | ±Error<br>2□ | <sup>235</sup> U/ <sup>207</sup> Pb<br>age (Ma) | ±Error<br>2□ |
|-------------|------|-----------------------------------------|--------------------------------------|--------------|-------------------------------------|--------------|-------------------------------------|--------------|-------------------------------------------------|--------------|-------------------------------------------------|--------------|
| <b>SG 1</b> |      |                                         |                                      |              |                                     |              |                                     |              |                                                 |              |                                                 |              |
| SG-1-04     | 0.74 | 1.33                                    | 0.0514                               | 0.0054       | 0.01670                             | 0.00056      | 0.1183                              | 0.0130       | 106.8                                           | 3.6          | 113.5                                           | 12.5         |
| SG-1-07     | 0.62 | 0.00                                    | 0.0495                               | 0.0076       | 0.01734                             | 0.00072      | 0.1185                              | 0.0188       | 110.8                                           | 4.6          | 113.7                                           | 18.1         |
| SG-1-09     | 0.75 | 6.46                                    | 0.0441                               | 0.0067       | 0.01705                             | 0.00068      | 0.1037                              | 0.0163       | 109.0                                           | 4.4          | 100.2                                           | 15.7         |
| SG-1-11     | 0.82 | 0.00                                    | 0.0503                               | 0.0088       | 0.01712                             | 0.00085      | 0.1188                              | 0.0216       | 109.4                                           | 5.4          | 114.0                                           | 20.7         |
| SG-1-12     | 0.38 | 0.00                                    | 0.0508                               | 0.0091       | 0.01660                             | 0.00083      | 0.1163                              | 0.0216       | 106.2                                           | 5.3          | 111.7                                           | 20.7         |
| SG-1-13     | 0.68 | 12.78                                   | 0.0465                               | 0.0086       | 0.01684                             | 0.00084      | 0.1078                              | 0.0206       | 107.6                                           | 5.4          | 104.0                                           | 19.9         |
| SG-1-14     | 0.56 | 0.00                                    | 0.0502                               | 0.0066       | 0.01739                             | 0.00074      | 0.1203                              | 0.0166       | 111.1                                           | 4.7          | 115.4                                           | 16.0         |
| SG-1-15     | 0.87 | 0.00                                    | 0.0464                               | 0.0075       | 0.01713                             | 0.00079      | 0.1095                              | 0.0184       | 109.5                                           | 5.1          | 105.5                                           | 17.8         |
| SG-1-16     | 0.82 | 1.43                                    | 0.0524                               | 0.0076       | 0.01732                             | 0.00078      | 0.1251                              | 0.0191       | 110.7                                           | 5.0          | 119.7                                           | 18.3         |
| SG-1-18     | 0.66 | 7.53                                    | 0.0545                               | 0.0101       | 0.01751                             | 0.00092      | 0.1316                              | 0.0252       | 111.9                                           | 5.9          | 125.5                                           | 24.1         |
| SG-1-19     | 0.71 | 3.37                                    | 0.0456                               | 0.0088       | 0.01709                             | 0.00083      | 0.1073                              | 0.0214       | 109.2                                           | 5.3          | 103.5                                           | 20.6         |
| SG-1-20     | 1.00 | 0.00                                    | 0.0512                               | 0.0067       | 0.01701                             | 0.00067      | 0.1200                              | 0.0164       | 108.8                                           | 4.3          | 115.1                                           | 15.7         |
| SG-1-22     | 0.56 | 10.79                                   | 0.0438                               | 0.0150       | 0.01790                             | 0.00130      | 0.1082                              | 0.0379       | 114.4                                           | 8.3          | 104.3                                           | 36.5         |
| SG-1-23     | 0.80 | 0.00                                    | 0.0487                               | 0.0092       | 0.01737                             | 0.00084      | 0.1167                              | 0.0228       | 111.0                                           | 5.4          | 112.1                                           | 21.9         |
| SG-1-25     | 0.86 | 2.09                                    | 0.0480                               | 0.0072       | 0.01716                             | 0.00072      | 0.1135                              | 0.0177       | 109.7                                           | 4.6          | 109.2                                           | 17.0         |
| SG-1-26     | 0.82 | 0.00                                    | 0.0534                               | 0.0098       | 0.01677                             | 0.00082      | 0.1235                              | 0.0234       | 107.2                                           | 5.2          | 118.3                                           | 22.4         |
| SG-1-27     | 0.72 | 0.00                                    | 0.0495                               | 0.0103       | 0.01641                             | 0.00086      | 0.1119                              | 0.0241       | 104.9                                           | 5.5          | 107.7                                           | 23.2         |
| SG-1-29     | 0.83 | 0.00                                    | 0.0497                               | 0.0085       | 0.01675                             | 0.00080      | 0.1147                              | 0.0205       | 107.1                                           | 5.1          | 110.3                                           | 19.7         |
| SG-1-30     | 0.71 | 0.00                                    | 0.0552                               | 0.0116       | 0.01779                             | 0.00101      | 0.1354                              | 0.0295       | 113.7                                           | 6.4          | 128.9                                           | 28.1         |
| SG-1-33     | 0.84 | 0.20                                    | 0.0507                               | 0.0062       | 0.01834                             | 0.00074      | 0.1282                              | 0.0166       | 117.1                                           | 4.7          | 122.5                                           | 15.8         |
| SG-1-39     | 0.86 | 0.00                                    | 0.0504                               | 0.0085       | 0.01615                             | 0.00098      | 0.1122                              | 0.0201       | 103.3                                           | 6.3          | 108.0                                           | 19.4         |
| SG-1-41     | 0.72 | 12.56                                   | 0.0464                               | 0.0095       | 0.01628                             | 0.00105      | 0.1041                              | 0.0225       | 104.1                                           | 6.7          | 100.6                                           | 21.7         |
| SG-1-42     | 0.78 | 0.29                                    | 0.0445                               | 0.0088       | 0.01716                             | 0.00108      | 0.1052                              | 0.0219       | 109.7                                           | 6.9          | 101.6                                           | 21.1         |
| SG-1-43     | 0.85 | 0.90                                    | 0.0489                               | 0.0077       | 0.01746                             | 0.00103      | 0.1177                              | 0.0199       | 111.6                                           | 6.6          | 113.0                                           | 19.1         |
| <b>SG 2</b> |      |                                         |                                      |              |                                     |              |                                     |              |                                                 |              |                                                 |              |
| SG-2-1      | 0.91 | 0.00                                    | 0.0507                               | 0.0060       | 0.01668                             | 0.00061      | 0.1166                              | 0.0146       | 106.7                                           | 3.9          | 112.0                                           | 14.0         |
| SG-2-2      | 0.43 | 9.80                                    | 0.0526                               | 0.0063       | 0.01787                             | 0.00066      | 0.1297                              | 0.0163       | 114.2                                           | 4.2          | 123.8                                           | 15.6         |
| SG-2-5      | 0.61 | 2.93                                    | 0.0544                               | 0.0074       | 0.01817                             | 0.00073      | 0.1363                              | 0.0192       | 116.1                                           | 4.7          | 129.7                                           | 18.3         |
| SG-2-6      | 0.69 | 0.03                                    | 0.0568                               | 0.0095       | 0.01735                             | 0.00081      | 0.1358                              | 0.0236       | 110.9                                           | 5.2          | 129.3                                           | 22.5         |
| SG-2-15     | 0.75 | 0.00                                    | 0.0521                               | 0.0055       | 0.01801                             | 0.00064      | 0.1295                              | 0.0143       | 115.1                                           | 4.1          | 123.6                                           | 13.7         |
| SG-2-21     | 0.74 | 7.92                                    | 0.0568                               | 0.0098       | 0.01952                             | 0.00084      | 0.1528                              | 0.0271       | 124.6                                           | 5.3          | 144.3                                           | 25.6         |
| SG-2-26     | 0.50 | 2.66                                    | 0.0553                               | 0.0102       | 0.01966                             | 0.00088      | 0.1499                              | 0.0284       | 125.5                                           | 5.6          | 141.8                                           | 26.8         |
| SG-2-34     | 0.43 | 0.00                                    | 0.0455                               | 0.0079       | 0.01772                             | 0.00072      | 0.1112                              | 0.0197       | 113.2                                           | 4.6          | 107.0                                           | 19.0         |
| SG-2-37     | 0.46 | 1.19                                    | 0.0510                               | 0.0047       | 0.01960                             | 0.00069      | 0.1377                              | 0.0135       | 125.1                                           | 4.4          | 131.0                                           | 12.8         |
| SG-2-43     | 0.42 | 2.29                                    | 0.0499                               | 0.0057       | 0.01680                             | 0.00064      | 0.1156                              | 0.0139       | 107.4                                           | 4.1          | 111.1                                           | 13.4         |

<sup>206</sup>Pb<sub>c</sub> percentage contributed by common Pb on the basis of the <sup>204</sup>Pb signal. The common Pb value was assumed to be that proposed by Stacey and Kramers (1975).

**Table SM 3** Sr–Nd isotope ratios for whole-rock samples from the Sirstan granitoid (SG) samples.

| Sample | $^{87}\text{Rb}/^{86}\text{Sr}$ | $^{87}\text{Sr}/^{86}\text{Sr}$ | $\pm 2$ S.E. | $^{147}\text{Sm}/^{144}\text{Nd}$ | $^{143}\text{Nd}/^{144}\text{Nd}$ | $\pm 2$ S.E. | $^{87}\text{Sr}/^{86}\text{Sr}(i)$ | $^{143}\text{Nd}/^{144}\text{Nd}(i)$ | $\square_{\text{Nd}}(t=110)$ |
|--------|---------------------------------|---------------------------------|--------------|-----------------------------------|-----------------------------------|--------------|------------------------------------|--------------------------------------|------------------------------|
| S4     | 0.220                           | 0.705123                        | 0.000011     | 0.163                             | 0.512619                          | 0.000010     | 0.704778                           | 0.512502                             | 0.1                          |
| S6     | 0.207                           | 0.705087                        | 0.000015     | 0.160                             | 0.512750                          | 0.000010     | 0.704763                           | 0.512635                             | 2.7                          |
| S12    | 0.354                           | 0.705216                        | 0.000014     | 0.162                             | 0.512742                          | 0.000007     | 0.704662                           | 0.512626                             | 2.5                          |
| S14    | 0.133                           | 0.705017                        | 0.000014     | 0.163                             | 0.512737                          | 0.000010     | 0.704808                           | 0.512620                             | 2.4                          |
| S17    | 0.415                           | 0.705084                        | 0.000014     | 0.166                             | 0.512741                          | 0.000009     | 0.704435                           | 0.512621                             | 2.4                          |
| S19    | 0.686                           | 0.705431                        | 0.000012     | 0.160                             | 0.512744                          | 0.000008     | 0.704359                           | 0.512629                             | 2.6                          |
| S27    | 0.403                           | 0.705306                        | 0.000011     | 0.160                             | 0.512740                          | 0.000008     | 0.704675                           | 0.512625                             | 2.5                          |
| S29    | 0.653                           | 0.705424                        | 0.000014     | 0.164                             | 0.512738                          | 0.000009     | 0.704403                           | 0.512620                             | 2.1                          |
| S30    | 0.363                           | 0.705310                        | 0.000011     | 0.155                             | 0.512738                          | 0.000007     | 0.704743                           | 0.512627                             | 2.5                          |
| XeS    | 0.487                           | 0.706464                        | 0.000012     | 0.176                             | 0.512743                          | 0.000007     | 0.705702                           | 0.512617                             | 2.3                          |

The Sr and Nd natural isotope ratios were normalized based on  $^{86}\text{Sr}/^{88}\text{Sr} = 0.1194$  and  $^{146}\text{Nd}/^{144}\text{Nd} = 0.7219$ . The average and  $1\sigma$  for isotope ratio standards are JNdi-1 =  $0.512097 \pm 0.000010$  ( $n = 13$ ) and for NBS987 =  $0.710240 \pm 0.000010$  ( $n = 17$ ). CHUR (Chondritic Uniform Reservoir) values,  $^{147}\text{Sm}/^{144}\text{Nd} = 0.1967$ , and  $^{143}\text{Nd}/^{144}\text{Nd} = 0.512638$  were used to calculate  $\epsilon_{\text{Nd}}$  (DePaolo and Wasserburg, 1976).
